# Supplementary material
Source: PubMed Central journal article supplement (PMC3529038)
Supplement: 1207715109_pnas.201207715SI.pdf [file 1207715109_pnas.201207715SI.pdf]

# Supporting Information

Frankel et al. 10.1073/pnas.1207715109

## SI RNAi Against *svb* in *D. virilis* Embryos

We tested whether *svb* is required for trichome morphogenesis in embryos of *D. virilis* by delivering 27 mer Dicer-substrate RNAs (DsiRNAs) (1) to 0–2-h-old embryos of *D. virilis*. We designed two DsiRNAs against different regions of the *D. virilis svb* mRNA (Fig. S3). DsiRNAs were chemically synthesized by Integrated DNA Technologies, Inc. We also purchased a DsiRNA control targeting the EGFP gene as a negative control. DsiRNA was either injected at 0.2  $\mu\text{M}$  in 0.1 mM Sodium Phosphate pH 7.8, 5 mM Potassium Chloride or delivered biolistically using a BioRad PDS-100/He system. For biolistics, 1  $\mu\text{m}$  gold particles were coated with DsiRNA as follows. Sterile beads were prepared in 50% (vol/vol) glycerol in 1.5 mL Eppendorf tubes following the manufacturer's instructions. Beads were pelleted, and glycerol was removed and replaced with 50  $\mu\text{L}$  50  $\mu\text{M}$  DsiRNA. The bead suspension was

placed on an Eppendorf Thermomixer at 1,400 rpm, and the top of the Eppendorf was opened. Twenty-five  $\mu\text{L}$  of 0.1 M spermidine was added to the open tube. Eighty  $\mu\text{L}$  of 1 M  $\text{CaCl}_2$  was added, one drop at a time, to the tube. The tube was capped and left mixing at 1,400 rpm for 5 min. The tube was then placed on ice for at least 15 min. The gold particles were pelleted, washed twice with 300  $\mu\text{L}$  of freshly prepared 70% ethanol, and resuspended in 60  $\mu\text{L}$  absolute ethanol. Tubes were wrapped in parafilm and stored at  $-80^\circ\text{C}$  until use. Embryos were dechorionated and shot with gold particles using a vacuum of 26-inch Hg, a target distance of 6 cm, and a Helium pressure of 1,100 psi. Embryos were stored in a humidified chamber for 24–48 h to allow hatching. Both injection and biolistics of DsiRNA produced comparable results (Fig. S4).

1. Kim DH, et al. (2005) Synthetic dsRNA Dicer substrates enhance RNAi potency and efficacy. *Nat Biotechnol* 23(2):222–226.



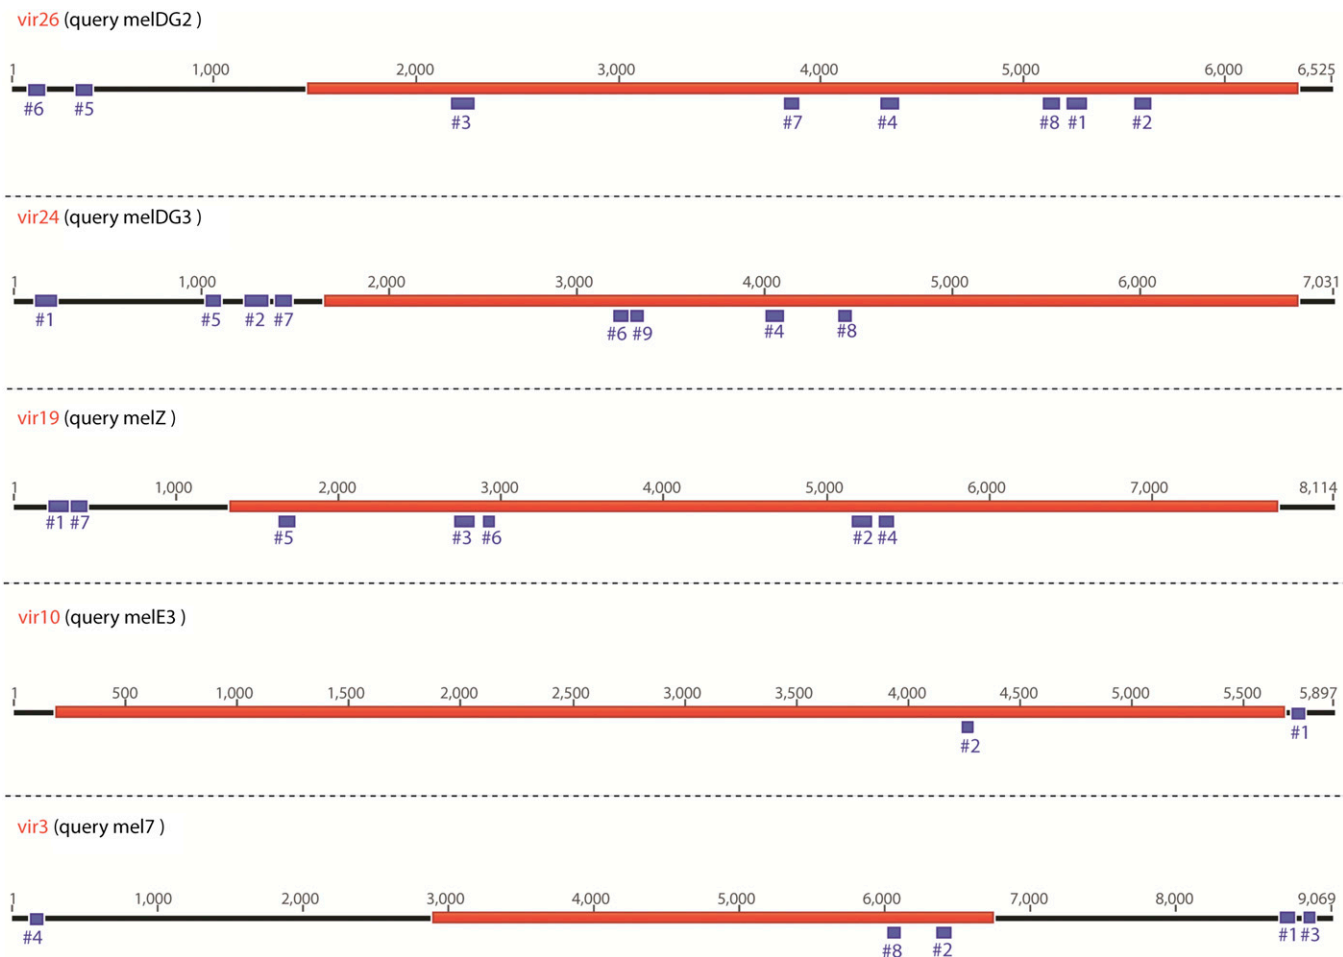

**Fig. S2.** Significant BLAST hits within and around the *D. virilis svb* enhancers. The BLAST hits were obtained with FlyBase BLAST tool (default parameters), using the full sequence of *D. melanogaster svb* enhancers as queries (see label above each scheme). Significant BLAST hits (E-value < 0.01) were mapped onto the *D. virilis svb* locus. The regions in red demarcate the *D. virilis svb* enhancers. The black lines represent flanking DNA. Regions corresponding to significant BLAST hits are marked with blue boxes. The number of each HSP is indicated below each blue box. Sequence length is indicated in base pairs. No significant similarities were found using melE6 as query.

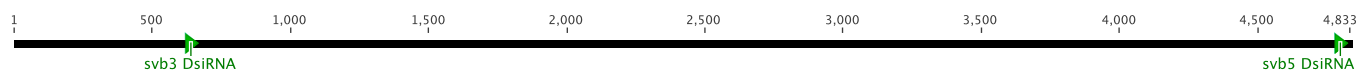

**Fig. S3.** Target locations of the two DsiRNAs designed against the *D. virilis svb* cDNA. The sequence for the *D. virilis svb* cDNA is National Center for Biotechnology Information Reference Sequence XM\_002057882. The sense strand sequences of the DsiRNAs are as follows: svb3—5'GCAACAACAACAACAACAACAGCAA; svb5—5'CGAACAATTTGCTCGGTCAGCTGCC.

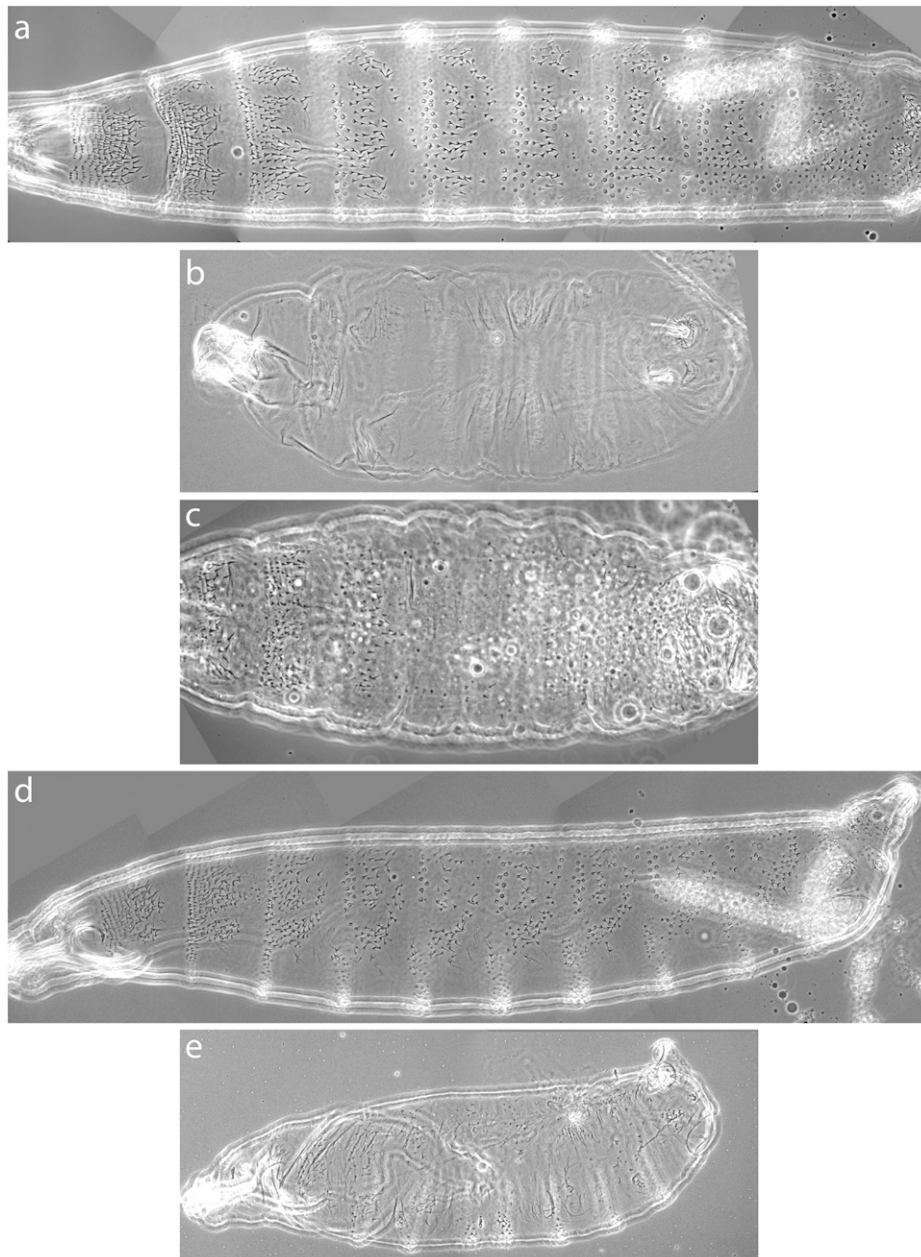

**Fig. 54.** Delivery of siRNA targeting the *svb* transcript in *D. virilis* embryos causes loss of dorsal and lateral trichomes in first-instar larvae. (A) Dorsal view of an embryo injected with DsiRNA targeting EGFP that displays a wild-type trichome pattern. (B) Dorsal view of an embryo injected with *svb3* DsiRNA that displays loss of almost all dorsal trichomes. (C) Dorsal view of an embryo treated with *svb3* DsiRNA via biolistics that displays loss of most dorsal trichomes. (D) Lateral view of an embryo treated with EGFP DsiRNA with biolistics that displays a wild-type trichome pattern. (E) Lateral view of an embryo treated with *svb5* DsiRNA with biolistics displays loss of most lateral trichomes. In all panels, composite images were generated in Fiji (1) using the Pairwise stitching plugin (2).

1. Schindelin J, et al. (2012) Fiji: An open-source platform for biological-image analysis. *Nat Methods* 9(7):676–682.
2. Preibisch S, Saalfeld S, Tomancak P (2009) Globally optimal stitching of tiled 3D microscopic image acquisitions. *Bioinformatics* 25(11):1463–1465.

**Table S1. Primers used to amplify enhancer constructs from *D. virilis***

| Region name | Forward primer                 | Reverse primer                  |
|-------------|--------------------------------|---------------------------------|
| 1           | AGTGACCCTGGCCTAGGTCTAC         | CACAGTAAACAAAACACTAATCCAAGTGGC  |
| 2longA      | TGTGCAGCTAAAAAGCTACAAGATCC     | CTTTGCTTGAACCTTGTCTACGTTTCC     |
| 2longB      | AGGAGTAGCAAGTAGCGTTCTAAGG      | CTGTGTGCCATAAATTTGTCTTCAAGC     |
| 2A          | TGCTTTCGGATTTGTTGTTG           | TTCCATCTTTCCCTTGGTTG            |
| 3           | GCGCGACCTAATCAAATTGCCAT        | TGTGCGCTCTGATAATTGAACCTCG       |
| 4           | TGAGCAGATATTAACGTTTAAAGAAGAGCG | AGTGCCAGTGACGTAATCACAGTAAC      |
| 5           | TGAGGACAGAAGCGAAAAGGT          | TTGACTTTTGTGCGTCTGC             |
| 6Ba         | TGCTGCTGTAAGTGTTAAAGTTTCG      | GAGGAAAAGATCCGATAGAATTGACC      |
| 6Bb         | CTGCTGTTTTGTGTACGTGTTTGC       | ACCAAGTTTAACTGAAGACCCACAGC      |
| 6A          | TATGCTTGACGGCACTCTG            | ATTTCCCATAAAGCAGCATGG           |
| 7           | CCACCTCTTGTGACGTGCACG          | ACTTGAAGTTGCTCTACTAAGAGACAC     |
| 8           | TACGTAACCGCCAGAACTC            | ATCTGCAGCCTGCTCATTTCT           |
| 9Y          | CGACTCTGGCATGGTTAAAGCTC        | TGAGACAGAGTTCTGGGCGGTTA         |
| 9X2         | GCCAACTATGTGAAATGGTTTCAATC     | GTGTCCATACCCTTGATTTGAGGCC       |
| 9X1         | AAAAGCTCAGGGCTTAAACAAGAGC      | GTTAACTAACTTTATCCAAACGTGTCAGC   |
| 10          | CCAATCGCATTCAATTGTATCTGAATGTG  | GAGCAACAATTGCGATATAAAGTTAATGTGC |
| 11          | CATGCAACAAGTCGCATATTGGTTGC     | CTGAGTCAAAGGTTGATCAGAGTTGATC    |
| Y           | CCACTTCCACCTAGAACCCTTT         | GTGCAGCAAGGCAACCAATATG          |
| X           | AGAAGGCACTGAGAGAGGCGATT        | AATATGCGTCCAGCTGCTCAGTC         |
| 15          | GCGCTGTCTGCGCCATTAC            | AGCGGTGTATCCTTTGCAGCAAG         |
| 16          | GAGCATGGAGTCAGAGAATATTAATTACG  | GACTTAAACGTATTACAGGCAAGCCG      |
| 17          | CTTGATCGCTGTGCTGAGCTGC         | GCTTCACCGTTAAGCTAACTGCAC        |
| 18          | CCCAAGTTCAATGTGAAACTGACG       | AGTTCGGATTCTTTGAGTGCAACC        |
| 19          | CCCAAAGTCTTGTGATACC            | GCAACTCTTTTGGCCAAGTGTG          |
| 20          | CAGTTTCACAGCTCAATGGATGG        | TTCTGCTCAAGAGTTTGTGGATGC        |
| 21          | AGAGAGAGCGAGTGTAGAATGAGAGG     | CCAAAAGTTCAACTGACACAACATATCG    |
| 22          | ATCAGCTGGACTTTCTTTTGGTATCG     | ACAGCACTTCCCTCATTTCTACTCTCG     |
| 23          | CAAAACCTGCAAAGCCATACGC         | AATCCGTTCCACAGTGATTAGCC         |
| 24          | CCAGCATCGCATCATATTAGCC         | TGGTGAGACGCTGACATAGCC           |
| 25A         | GCTTTGACCACAAAGCTTAATAGGG      | AGATGGATGGCTAGATGGTTAGTTGC      |
| 25B         | CATATGACATGTTGCCAAGAAACG       | GTCCGAGTCACAGCAGAGATATTAGC      |
| 26          | ATTTTGGCCAAGGAAAAGAAGC         | GCCCATTTTCAATAGCATCAGC          |
| 27A         | AGTCCTAGATGCGAACCTCAACC        | TAGCACTTCAGACATCAAACAACCTGC     |
| 27B         | CTACCACAGGGGATAGATGAAAAGC      | TCATCGTTTAGGTGATTGTCTTACGG      |
| 28          | GCGCAAACTCACTGCATATTCC         | TCGGCTCTCTCCATCTCTCTCC          |

**Table S2. Primers used to amplify enhancer constructs from *D. ezoana* and *D. littoralis***

| Region name             | Forward primer                             | Reverse primer                             |
|-------------------------|--------------------------------------------|--------------------------------------------|
| <i>D. ezoana</i> 3      | <u>CCGCGGCGACCTAATCAAATTGCCATTA</u> AAACCG | <u>GTTCGACG</u> CCAGCCAAAGCTTCTGTTACTGTC   |
| <i>D. ezoana</i> 8      | <u>CCGCGGACGATGGCGAAAGACGACCGCA</u> ACTG   | <u>GTTCGACTTCTCTT</u> CAGCCCCCTGCTTGTACGCC |
| <i>D. ezoana</i> 19     | <u>CTCGAGTTTGACAGCCAGTTGAACGGACGCGG</u>    | <u>CTCGAGTCCCCAGTAGTCCATTGCACTTGGGCG</u>   |
| <i>D. littoralis</i> 3  | <u>CCGCGGCGACCTAATCAAATTGCCATTA</u> AAACCG | <u>GTTCGACG</u> CCAGCCAAAGCTTCTGTTACTGTC   |
| <i>D. littoralis</i> 8  | <u>CCGCGGACGATGGCGAAAGACGACCGCA</u> ACTG   | <u>GTTCGACG</u> CGGCTTGGCTTTGGCTTTGGCTTTGG |
| <i>D. littoralis</i> 19 | <u>CCGCGGTTTGACAGCCAGTTGAACGGACGCGG</u>    | <u>GTTCGACTCCCCAGTAGTCCATTGCACTTGGGCG</u>  |

The underlined sequences correspond to restriction enzyme sites used for cloning.
